# Supplementary material for: Facile preparation of 2D sandwich-like CdS nanoparticles/nitrogen-doped reduced graphene oxide hybrid nanosheets with enhanced photoelectrochemical properties
Source: Royal Society of Chemistry journal article supplement (doi:10.1039/c4ta04624b), 2014-10-08
Supplement: c4ta04624b1.pdf [file c4ta04624b1.pdf]

# Facile Preparation of 2D Sandwich-Like CdS Nanoparticles/ Nitrogen-Doped Reduced Graphene Oxide Hybrid Nanosheets with Enhanced Photoelectrochemical Properties

Sunli Wang,<sup>a</sup> Jingjing Li,<sup>a</sup> Xiaodan Zhou,<sup>a</sup> Changcheng Zheng,<sup>b</sup> Jiqiang Ning,<sup>c</sup> Yijun Zhong,<sup>a</sup> and Yong Hu\*,<sup>a</sup>

<sup>a</sup>Key Laboratory of the Ministry of Education for Advanced Catalysis Materials, Institute of Physical Chemistry, Zhejiang Normal University, Jinhua, 321004, P.R.China. E-mail: yonghu@zjnu.edu.cn

<sup>b</sup>Mathematics and Physics Centre, Xi'an Jiaotong-Liverpool University, Suzhou, 215123, P. R. China

<sup>c</sup>Department of Physics and HKU-CAS Joint Laboratory on New Materials, The University of Hong Kong, Pokfulam Road, Hong Kong, P. R. China

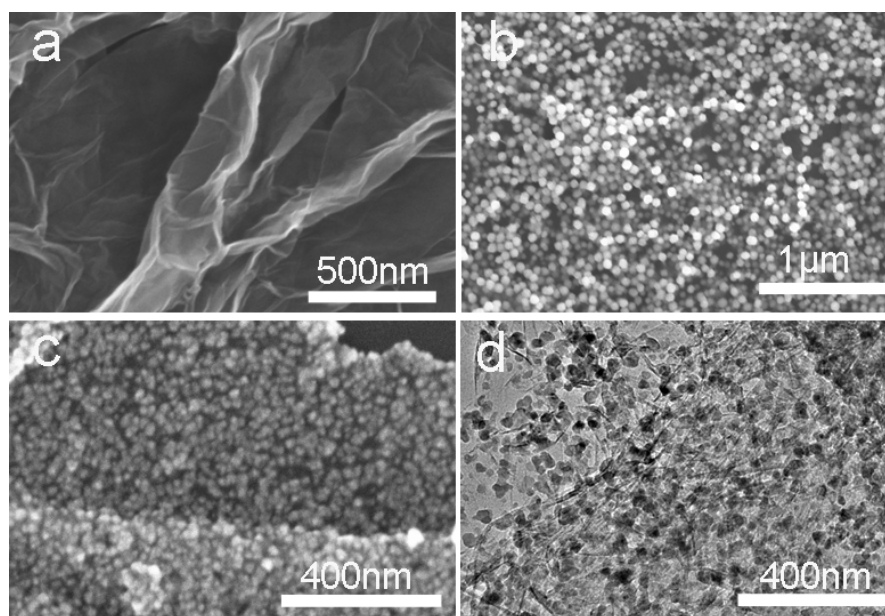

**Fig. S1.** SEM images of the as-prepared N-rGO Ns (a), pure CdS particles (b), and CdS/rGO HNs (c); (d) TEM image of the as-obtained CdS/rGO HNs.

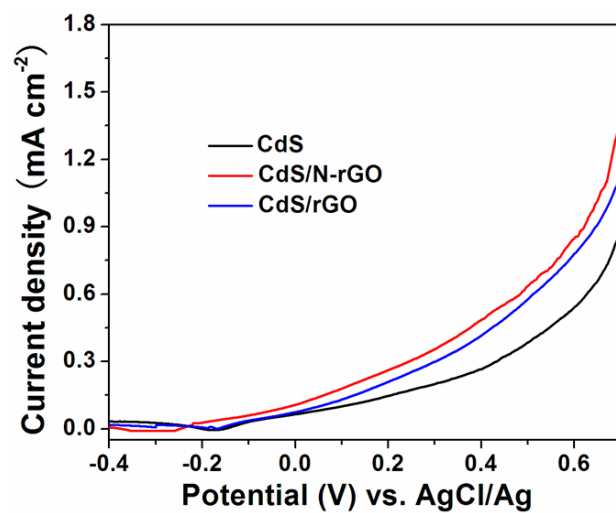

**Fig. S2.** Photocurrent density vs. applied potential curves for the pure CdS, CdS/rGO and CdS/N-rGO HNs electrodes in 0.1 M of PBS (pH=7.4).

| Samples   | S <sub>BET</sub> (m <sup>2</sup> /g) |
|-----------|--------------------------------------|
| CdS       | 9.43                                 |
| CdS/rGO   | 17.33                                |
| CdS/N-rGO | 15.76                                |

**Table S1.** The BET surface area of the as-prepared CdS, CdS/rGO and CdS/N-rGO HNs.

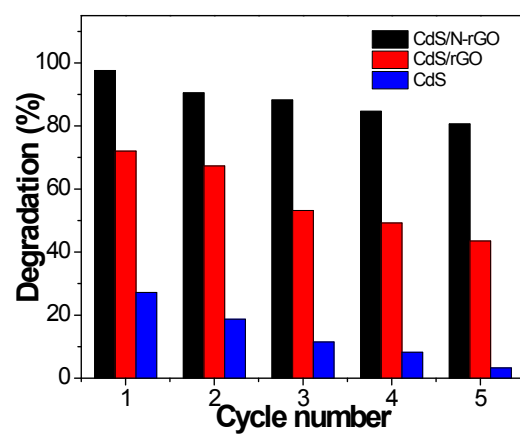

**Fig. S3.** 5 cycles of degradation of RhB using the as-prepared pure CdS, CdS/rGO and CdS/N-rGO HNs as the photocatalysts
